# Supplementary material for: Interventricular Septal Hematoma and Coronary-Ventricular Fistula: A Complication of Retrograde Chronic Total Occlusion Intervention
Source: Case Rep Cardiol. 2016 Sep 7;2016:8750603. doi: 10.1155/2016/8750603 (PMC5030402; doi:10.1155/2016/8750603)
Supplement: Supplementary file 1 — RCA CTO PCI was complicated by large interventricular septal hematoma “5.3 × 2.6 cm” at end systole (video 1), with coronary-ventricular fistula (5 mm in diameter) (Video 2). At 3 months post PCI a subsequent echocardiogram showed resolution of the hematoma (Video 3). [file 8750603.f1.zip]

Archive with 3 entries (3 files):
- 128743_0_vid_3_nwlbzb.mpeg
- 128743_0_vid_4_nwlbzn.mpeg
- 128743_0_vid_5_nwlbzp.mpeg
